# Supplementary material
Source: MDPI journal article supplement (https://www.mdpi.com/search?q=genes-11-00718)
Supplement: s001 [file genes-11-00718-s001.pdf]

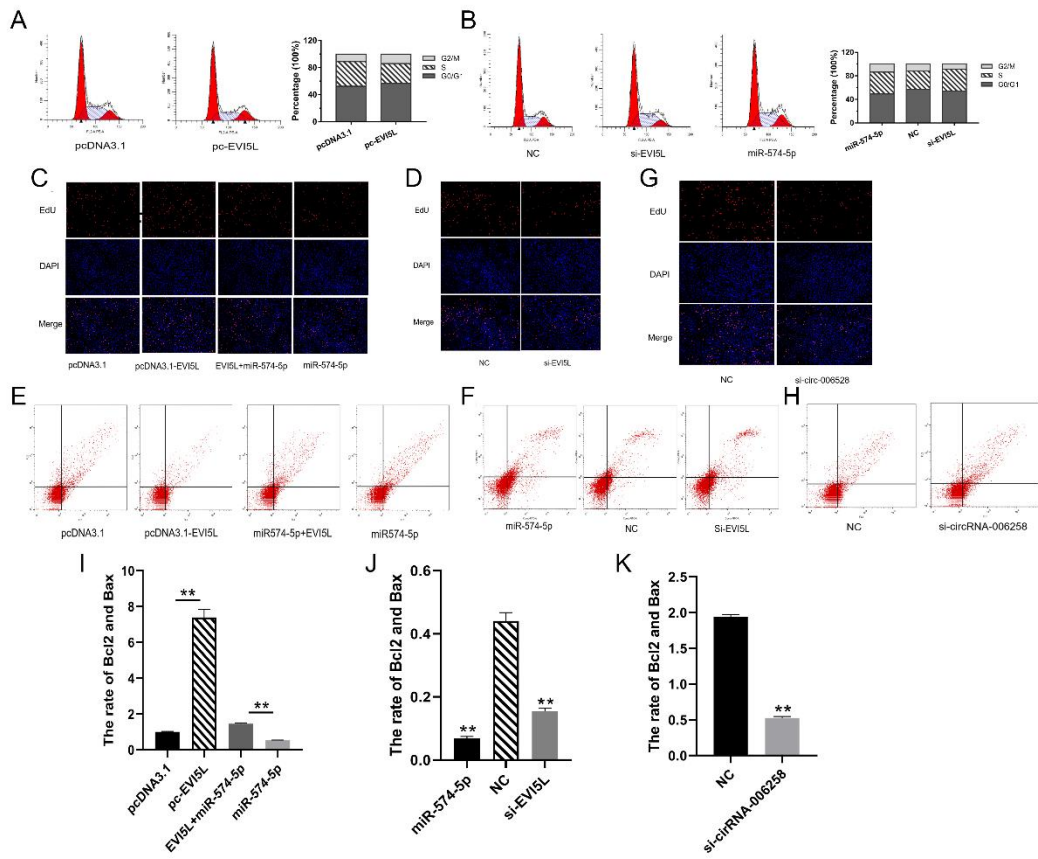

Figure S1: *EVI5L* and circ-006258 promoted GMEC proliferation in GMECs

Table S1 The validated primers used for psiCHECK-2 vectors

| Name        |        | Sequence (5'→3') |                                     |
|-------------|--------|------------------|-------------------------------------|
| EVI5L       | wild   | FORWARD          | CACTCGAGCCTTCTCGGTGCTCCTGGAG        |
|             | type   | REVERSE          | ATGCGGCCGCATCTTTCCTGCCTGGGCGAC      |
|             | mutant | FORWARD          | CCCTCGAGGGACCTCATGACCCCGG           |
|             | type   | REVERSE          | TAAAGCGCCGCTGCTTTATTCATCTTTCCTG     |
| circ-006258 | wild   | FORWARD          | CGCTCGAGTGACCACATCACTCTGGGGC        |
|             | type   | REVERSE          | GCGGCCGCCAGTCTTGTGGGGCTGGGAA        |
|             | mutant | FORWARD          | CCCTCGAGGGATTTGCTTCAAGATAACCTGATGGG |
|             | type   | REVERSE          | TAAAGCGGCCGCGGAAGCTGTTGCATGGAGAGC   |

Table S2 EVI5L, circRNA-006258 and miR-574-5p sequences

| miR-574-5p | TGAGTGTGTGTGTGTGAGTGTGTG                                                                                                                                                                                                                                                                                                                                                                                                                                                                                                                                                                                                                                                                                                                                                                                                                                                                                                                                                                                                                                                                                                                                                                                                                                                                                                                                                                                                                                             |
|------------|----------------------------------------------------------------------------------------------------------------------------------------------------------------------------------------------------------------------------------------------------------------------------------------------------------------------------------------------------------------------------------------------------------------------------------------------------------------------------------------------------------------------------------------------------------------------------------------------------------------------------------------------------------------------------------------------------------------------------------------------------------------------------------------------------------------------------------------------------------------------------------------------------------------------------------------------------------------------------------------------------------------------------------------------------------------------------------------------------------------------------------------------------------------------------------------------------------------------------------------------------------------------------------------------------------------------------------------------------------------------------------------------------------------------------------------------------------------------|
| EVI5L      | <p>TTCACAGACAGTGCTGTGACCTTACCCTGCTCACAGCTGAGGAGCCT<br/> GACCACCATGGCGAGCCCCACTCTGAGCCCCGACTCCTCATCCCAGG<br/> AGGCCCTGTCAGCCCCTACCTGCTCCCCACCTCTGACTCCGAGAAC<br/> CTCAGCCCCGATGAGTTGGAGCTGCTGGCCAAGCTTGAAGAGCAGA<br/> ACCGGCTACTGGAGGCCGACTCCAAGTCCATGCGCTCCATGAATGGC<br/> TCCCCGGCGAACAGCGGCTCCTCGCTGGTGTCCAGCTCCTCAGCCTC<br/> CTCCAACCTGAGCCACCTGGAGGAGGACACGTGGATTCTGTGGGGCC<br/> GGATTGCCAATGAGTGGGAGGAGTGGCGACGCCGAAGGAGAAGCT<br/> GCTGAAGGAGCTGATCCGCAAGGGCATCCCACCACTTCCGGGCC<br/> ATCGTCTGGCAGCTCCTGTGCAGTGCCACAGACATGCCGGTTAAGAA<br/> CCAGTACTCAGAGCTGCTCAAGATGTCGTCCCCCTGCGAGAAGCTCA<br/> TCCGCAGGGACATCGCCCGCACCTACCCAGAGCACGAGTTCTTCAAG<br/> GGCCAGGACAGCCTAGGCCAGGAGGTCTCTTCAATGTCATGAAGG<br/> CCTACTCGCTGGTGGACCGGAGGTGGGCTACTGCCAGGGCAGCGC<br/> CTTCATCGTGGGCCTGCTGCTCATGCAGATGCCTGAGGAGGAGGCCT<br/> TCTGTGTGTTTCGTGCGGCTGATGCAGGAGTACCGCTACGGGAGCTC<br/> TTCAAGCCCAGCATGGCCGAGCTGGGGCTCTGCATCTACCAGTTTGA<br/> ATACATGTTACAGGAGCAGCTCCCGGACCTGAACACCCACTTCCGCT<br/> CCCAGAGCTTCCACACGTCCATGTATGCCTCGTCCTGGTTCCTCACAC<br/> TCTTCCTCACCACTTCCCCTGCCCCGTCGCCACCCGTGTGTTTGACA<br/> TCTTCATGTACGAGGGCCTGGAGATCGTCTTCCGGGTGGGCCTCGCC<br/> CTGCTGCAGGTGAACCAGACGGAGCTGATGCAGCTGGACATGGAGG<br/> GGATGTCCCAGTACTTCCAGAGGGTATCCCCATCAGTTCGACAGC<br/> TGTCAGATAAGCTGATCCTCAAGGCTTACCAGGTCAAGTACAACCC<br/> CAAGAAGATGAAGAGGCTGGAGAAGGAGTATGCGGCCATGAAGAG<br/> C AAGGAAATGG AGGAGCAGAT TGAGATCAAGAGGCTTCGGA<br/> CGGAGAACCGGCTCCTGAAGCAGCGGATCGAGACCCTGGAGAAGGA</p> |

GAGCGCTGCTCTGGCTGATAGGTTAATACAGGGGCAGGTGACGCGC  
GCACAGGAGGCAGAGGAGAACTACGTCATCAAGCGGGAAGTGGCTG  
TGGTGCGGCAGCAGTGCAGCTCGGCGGCCGAAGACCTGCAGAAGGC  
GCAGAGCACAATCCGGCAGCTGCAGGAGCAGCAGGATAACCCGCGC  
CTCACCGAAGACTTTGTGGCCCACCTGGAGACGGAGCTGGAGCAGTC  
ACGGCTTCGGGAGACCGAGACCCTGGGGGCACTTCGGGAGATGCAG  
GACAAGGTTCTGGACATGGAAAAGAGGAACAGCTCGCTGCCGACG  
AGAACAACGTGGCTCGGCTTCAGGAGGAGCTGAAGGCGCTCAAGGT  
TCGGGAGGGTGAGGCGGTGGCCTCGGCGCGGGAGCTGAAGCTGCAG  
CTGCAGGAGCTCTCGGACACCTGGCAGGCCACCTGTCCCGCGGTGG  
CCGCTGGAAGGAGTCCCCGCGAAGTTGGTCTGGGCGAGCTGCAG  
GACGAGCTGATGAGCGTGCGGCTGCGCGAGGCCAGGCGCTGGCCG  
AGGGTCGAGAGCTGCGGCAGCGCGTGGTGGAGCTCGAGACGCAGGA  
CCATATCCACCGCAACCTGCTGAACCGTGTGGAGGCTGAGCGCGCGG  
CGCTGCAAGAGAAGCTGCAGTACCTGGCGGGCGCAGAACAAGGGGCT  
GCAGACGCAGCTCAGCGAGAGCCGCCGAAGCAGGCGGAGGCCGAG  
TGCAAGAGCAAGGAGGAGGTGATGGCCGTGCGCCTGCGGGAGGCGG  
ACAGCATGGCGGCGGTGGCCGAGATGCGGCAGCGCATCGCCGAGCT  
GGAGATCCAGAGAGAGGAGGGCCGCATCCAGGGCCAGCTGAACCAC  
TCGGACTCGTCGAGTACATCCGCGAGCTCAAGGATCAGATCGAGG  
AGCTGAAGGCCGAGGTGCGGCTGCTGAAGGGTCCGCCGCCCTTTGA  
GGACCCGCTGGCCTTCGACGGGCTGGGCCTGGCGCGGCACCTGGAC  
GAGGACTCACTGCCGTCGTCCGACGAGGAGCTGCTGGGCGTGGGCG  
TGGGCGTGGGCGCCGCGCTGCAGGATGCGCTCTACCCGCTGTCCCCG  
CGCGACGCGCGCTTCTTCGCCGGCTGGAGAGGCCGGCCAAGGACA  
GTGAGGGCAGCTCCGACAGCGACGCCGACGAGCTGGCTGCGCCCTA  
CAGCCAGGGCCTGGACAAGTGAAGGCCGTGCCCGCGTGTCTCGGAGC  
CAGGGCGCGGGGGTAGGCGGGTGGGCGCCGCCAGCCCGCTCCTGC  
GTGGGCGCCAGCTTCTCACTGACTCCACGCCCTCGGCGGTTTCACCC

ACCCAGAGGGCCAGGCCAGCACACAGCTGGGCACAGAGGGCAGGG  
CCGGAGGCTGGGGATCCTCACAGTGCCCTGGCAGGCCACCCTCCCC  
AGCAGTGTTTACCCATCTTGGTCCGTTCCCTTCTCGGCCCGTTACCT  
GGAAGGTCTGCCTCTCTTAACAGCCAGGGCCAGGAGGACCCAAGGG  
TCCCAGGACTGCACCAACGGACGCTCCCTCTCCTAGCTGGCCTCCTC  
CTGGGACAACAGCGGCCCTGCCGGGAAGGGCCCAGGCTCTGGGGCA  
GGCCTGAGGAAGAAGGTGCCCTGTAGGCCAGACTTTACCACCCATG  
AAGGCCCTGGGGACCCTTGGCCTCTGGAGATAGATGGCCAGGCACT  
GCCTGGTGCAGGCATTGTGGCCCCTGCAACAGAAACCAAAGTCCCC  
CTACTGAGTGCAGGGCTGCCAGGGTGTGAGCGGCTAGCTGGAACCA  
GCCAGGGCCTGGGCAGTACCTGTCCCTATTCCTAGAGGCCAGAGCA  
GCTGTAAGGAAGTGGAGAGACCTCCCCCTCCCCAGCACCCACCTCT  
TCCTCTGTGGCAGCCCCATCACCCAGCTTGGCCAGTGACGGGGGGA  
GAGGAGCTCCCCATGCAGGCTAGCCTCCTCTCCAGGGGATCCCCAGC  
CTCCAAGTCCCTTCTCCTCTGTATCCCTAGCCCCACCCTCCAGCCCC  
AGGGGAGGAGGCCTCCTGGCTGAGTTCCCCCACAACCTGCTCACAG  
TGGTCCCGTGGTCTCTGCTGAGTCAGAGCCAAGAACGGTGCCAAAGT  
CCAACGATGCCCCAGATCCAACCCCCGGGACCTCATGACCCCCGG  
GCTGACCTTCTCGGTGCTCCTGGAGCCTAGAACAGCATCACAAACAG  
TCCCCCTGGCGCTTCTGGGGTGGAGATCCATGCTCAGTCCCCCTTC  
CCGGTCGCCCACTCAGTGTTACAAAGCCTGGGGACCAGGGTGGGCAT  
CCCAGGGGCTCACCCACATGCCCCCGCACTGCCACCACCATTTTG  
CACACTGCCTGTTCACTCCACATGTCGCCAGGCAGGAAAGATGG  
AAAATAAAGTGTATTTACACAGTCA

circ-006258

GCAGTGGCGTGGAACACGCTGGCCAGGTACAGGTCCTTCTTGCCCGA  
CATGCGAGACAGGTCTGCCTTGTCTTGTGCGATGGCCTCGGTGAGAC  
CCAGCCCAGCCAAGTGTCTTCTGTAGAACCAGGTGGATGATGGTGAAG  
CCATGGTAGGCAAAGTTCCTAGCCCCTTACCCTCCACCCACACCACC  
CACTGTCTCTCTTCTTCTCTGAGCAGAAGTCACCATTCCTGGCCACC  
TTCTGTGTGCCAGACATGGTGTGGAAACTGCAAACCACTTTCCTAAT  
TCTTGACAGCCCTGCAAGAGCTTCCAATCACCCTTACAGATGAGG  
AAACCAAGACTCAGGGGGAAAAGGCAGAATATATGCCTGGACCCAC  
TGAGCAGTCTTGACCTGTGGTATGAGTAGTAGACAGCCAGCATCGGC  
CTCCCCTGGGGGCTTATATGAAATGCACGTTTTCTGCTCCAGCCCAG  
AGCCTCTGAATCACAGTGTCTGTAGGTAGACCAGGAACCCTTCTTAA  
CCAACCTCTCCAGGTAATTCTTGACACACTCATGTTTGAGAAAGACTG  
ACCTAAGGACAGCTCTGACCACATCACTCTGGGGCTTAAAATCTTTC  
CAGAGTGATATGAAGGCTGGGATTTGCTTCAAGATAACCTGATGGGT  
GTGATAGTTGATGTTGAGTGATGGATACATGAGGGTTCCTTACATTA  
ATCTATTTTTAATATATGTTAATGTATTTCCATAGTATCTCAAAAGTT  
AACACACACACACACTCTCTCTCTCTTCTCTCTCTTTCCAAG  
GCTCTGCACAGCCCCTGGAAGCCAAGGACAAGCTCTTTCCTAGGAAG  
TGTGCTTGCATCACAGTTTCACCCCTAGCATGTACCCTCTGCTCTCC  
ATGCAACAGCTTCCCTGAAACTGCCTCCTCAATAGCATCTTGTGTCT  
ACCCTGTCTCTGTAAGGCCCTTTAGACGCCACGTCTTCTGGGGAGCC  
TTCCCAGCCCCACAAGACTGGAGCCACGCAGCCCTGGCCTCGCTCTA  
TCAGTATATGGTCCTGTTGTCTCTCCACCTGGCTCGGTGCTCCCTCA  
AGGCAGGGCCCATGTTTGGGGCTCACCCCTGCTCTCAGTGCAGAAGAG  
GCGGTGGTAAAGAACTGTCGGCTGAGTGAACAGCTGCCCTCAGGGC  
CCAGCTTCTGGAGGACAGTGCACCTCCCCAGCATGGCCAAACCGGCC  
TGATACCTAGGGGCTGAGAGTCCAGGTGTCCCGAGAGAGGCATTC  
GAGGCCAGCTATTCCAGTCCCCATGACTTTGCACAAATTACCACTT  
GGAATTTTCCACCTCCATCTACTGTAGGGTGGTAGACAGTGTGTCCA  
CCCAGCGTGCCAGGAAAACACGGGAGAAAGAAGACGAGTCAGGTG  
ATGGCAACTGCAGAACGGGCTGGGGGAGTGTGAGAACAAGCCAGG  
AGGGAGACGGGTGTGGCTTCTCTCTGGAAACCTCATGCTGTCTACCG  
CACAGACCACACAAGTTCTACCAGCCTCCAGCTTGG  
AGTCTAAGCCCCATCTCATCTCAAGCTTTCTCCTCCACACTCCCTCAG  
CAGCAAGTCTGAATCAATTCTGCAGGCAAGCGATCACCTACAGAAA  
CGTTTCTGGAACCTAAGGGAGGAATGAGATGAAAGTTTTCTTTTTTG  
AACAGAGAAAAAAAAAAAAAAAAATCTCTCCTGATTGACAGAAAGGCCAC  
CCTGAGTCTCCACCTGAGAAGTGCAGCCCCAGCACTTACTATCCAGG  
GTAACCTGAGCAAGTCACTGCTTCTCTCTGAGCTGCTGCCACCACC  
CAGGGTGGTCATGAGGGGGAAACGATGCTTAGCAGGTTGGTTAAGT  
TTCCAACCAAGTCACTCAGAGCTGAAAGCTATTATTAGTCTTACTAG  
TGCATGGGGAACAATCCTCCAGCTTGAATAGTGGAGGCATACCCTAG  
AGACATTGCGGGTTTTGGTTCCAGACCACCACAATGAAGTGAATATTG  
CAATAAGTGAGTCACACAAATTTTTTGCTTTCCCGATGCATATAAAC

GTTATGTTTGCACTATAGTCTATCAAGTCTGCAACAGCATTATCCCTT  
AAAACAATGTATGTACCTTAATTA AAAATGTTTCATTGCTAAAAATG  
CTAACCATCATCTGAGTCTTTAGGGAGCTGTAATCTTTTGCTGGTGGGA  
GGGTTTGAAATATTGAGAGAATTACCAAAATGGGACCCAGAGACAT  
GAAATGAGCAAACGCTGTTGGAAAAGTGGAGCCAGACTTGCTTGAT  
GTAGAGTTGCCATAAATCTTCAAAAATTTGTAAAAAAAAAAAAAATTG  
CAATAAAGAAAAGCACGATAAAATGAGGTATGCCTACACCTTGTGC  
TAAGAGGCAGCACAATGTAAGATTAAGGACATGGCTTGATGCTAAA  
TGCTGAGTTAGTGACTGTATGACTCTGGATAAGTTATTCAACTTTTC  
TGAGCCTCAGTTTCCTCATCTGTAAGATAAGGCTGATAGTCCTGCCT  
AATATGGTGTGAGGATTAAGAATTTAACACATGCAGAGTGCTTAGG  
AAGTGTGCCTGGCACACAGCAGGTGCTCAATTATACTTAAGTATTGA  
TGTGTACCATCTTCCCAAAGGCAGGGACCCATGCCCCCTCCCTT  
GGCACAGCCCAGTACTGCCTGGACACCCAGAGGGGCTCAGGACAGA  
CCCGCTGAGCTGGTGACAGACCACCCCTGCCAACTCTAAGCCCT  
GCAGGCCCTGAGTTGGGCCTCCCCTCACCTGCAGGTCGTGGGTCAC  
CTCCACGACTCCCTTGGGCAGGGAGATGGCTACAGCCTTCTTCTGCA  
TCTTGCCCATCCAGACCTTCAGCTGCTCTTTGGTCAGCAGCTTTTCCA  
GGCGCTCAAGGGGCTCCACGTGGTGGGGCATGATGATGATGAGGCT  
GGACAGCTTGTGCGCCAGCGGCATCTCCACCATCTGCAGCTTCTCCT  
TCTCGTCGTCATAGTA
